# Supplementary material for: Selective sensing of H2PO4− (Pi) driven by the assembly of anthryl pyridinium ligands
Source: Royal Society of Chemistry journal article supplement (doi:10.1039/c2ob26135a), 2012-01-01
Supplement: c2ob26135a.pdf [file c2ob26135a.pdf]

## Supporting Information

### **Selective Sensing of $\text{H}_2\text{PO}_4^-$ (Pi) Driven by Assembly of Anthryl Pyridinium Ligand**

Weitao Gong\*, Qinglan Zhang, Furui Wang, Bei Gao, Yuan Lin and Guiling Ning\*

*State Key Laboratory of Fine Chemicals and School of Chemical Engineering,  
Dalian University of Technology, 2 Linggong Road, Dalian 116024, P.R.  
China.*

\*To whom correspondence should be addressed.

E-mail: wtgong@dlut.edu.cn; ninggl@dlut.edu.cn.

Experimental Section

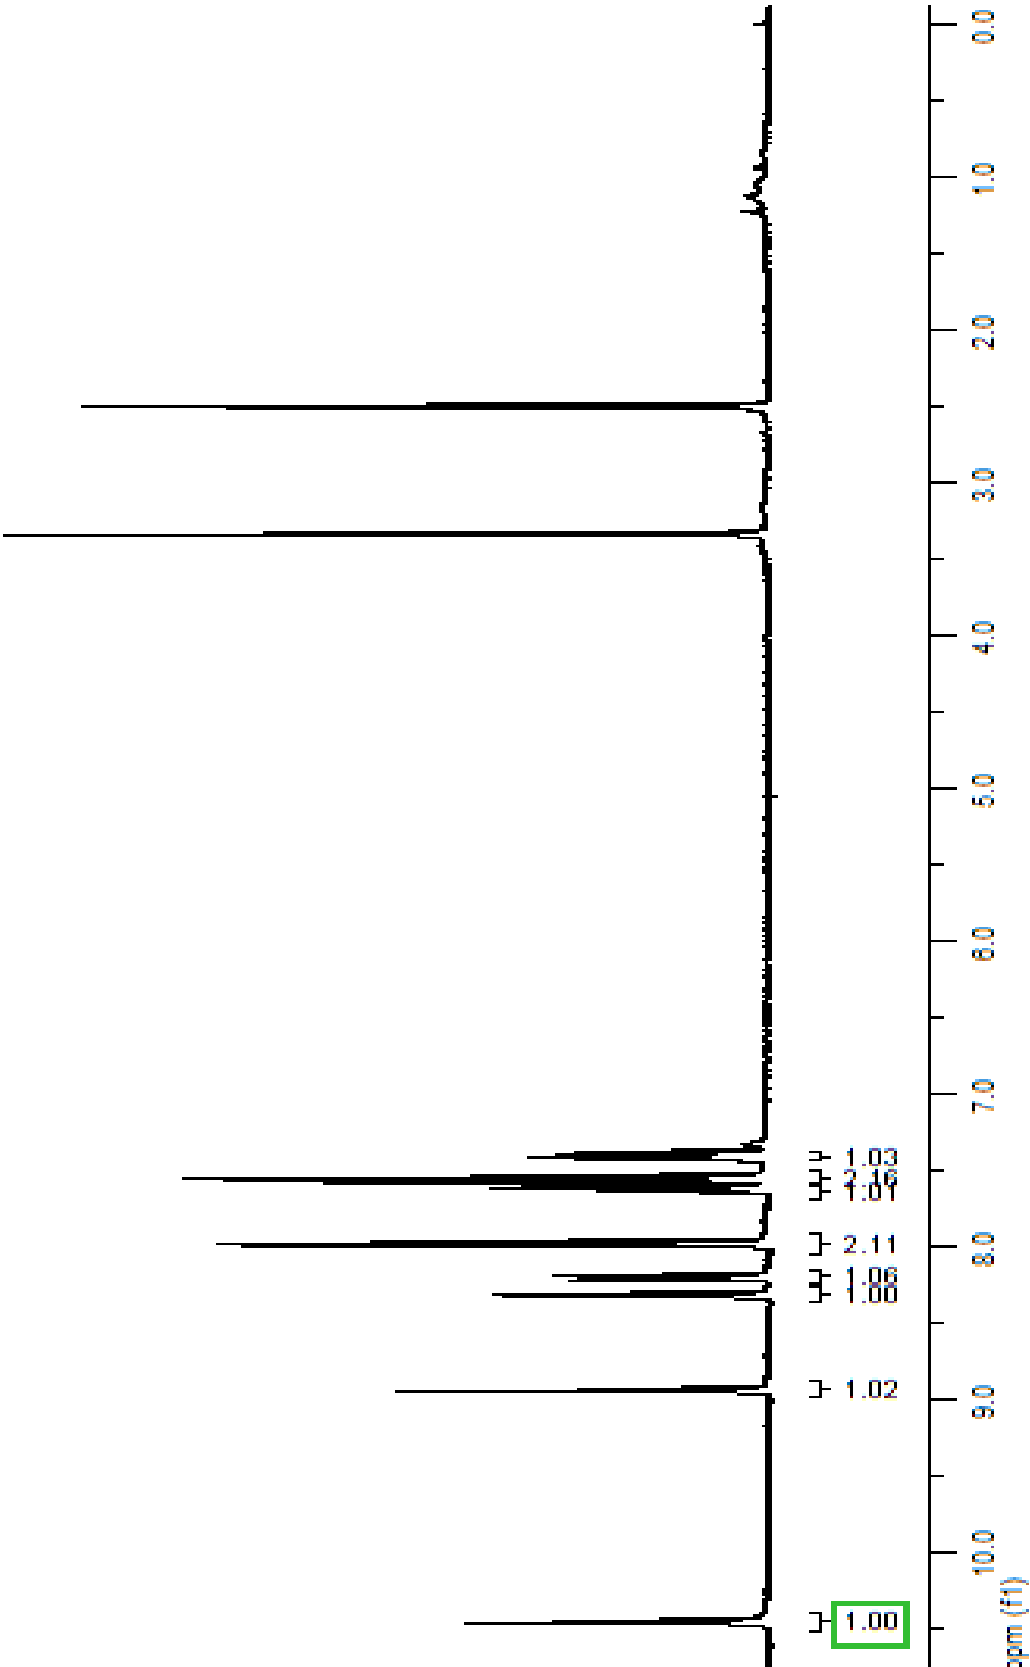

Figure S1 <sup>1</sup>H-NMR of P1

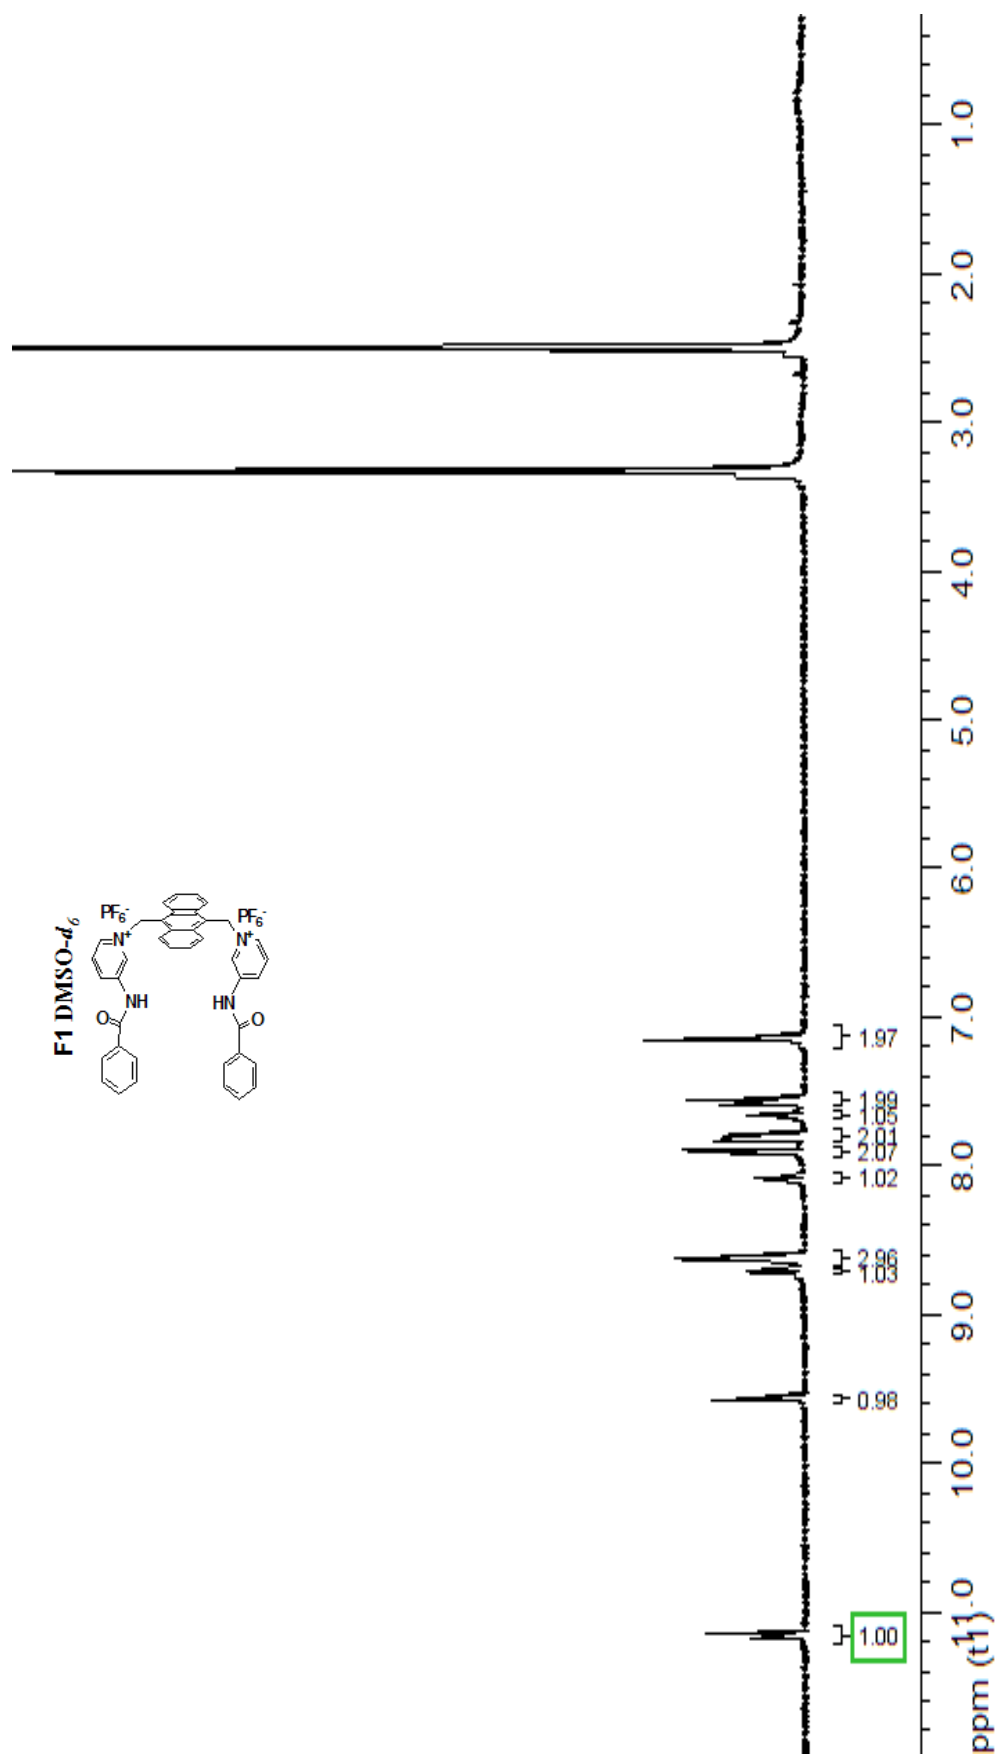

Figure S2 <sup>1</sup>H-NMR of F1

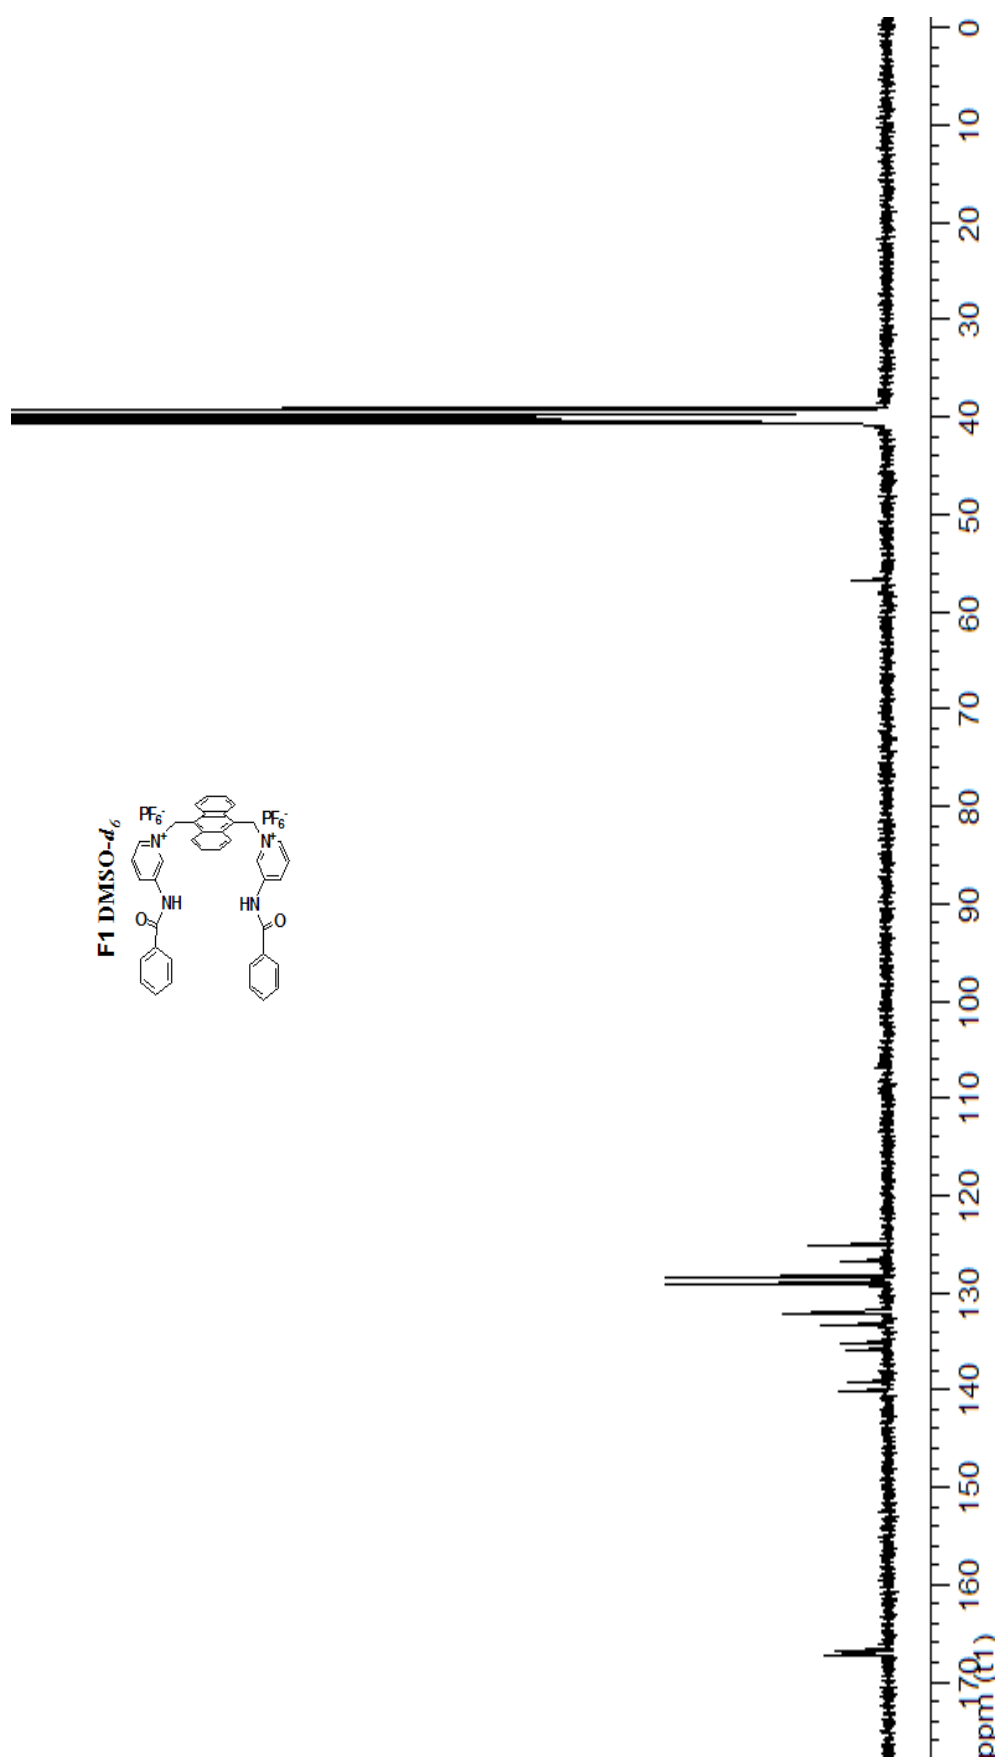

**Figure S3** <sup>13</sup>C NMR of F1

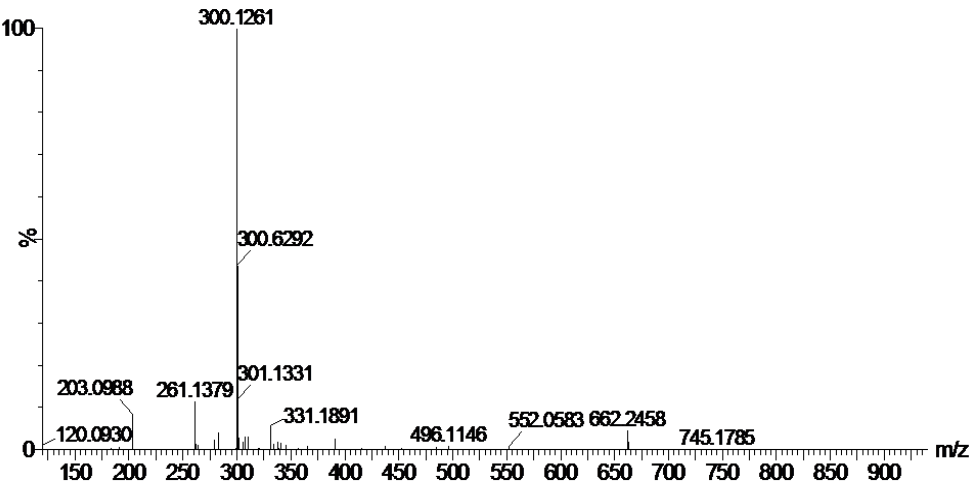

Figure S4 HRMS of F1

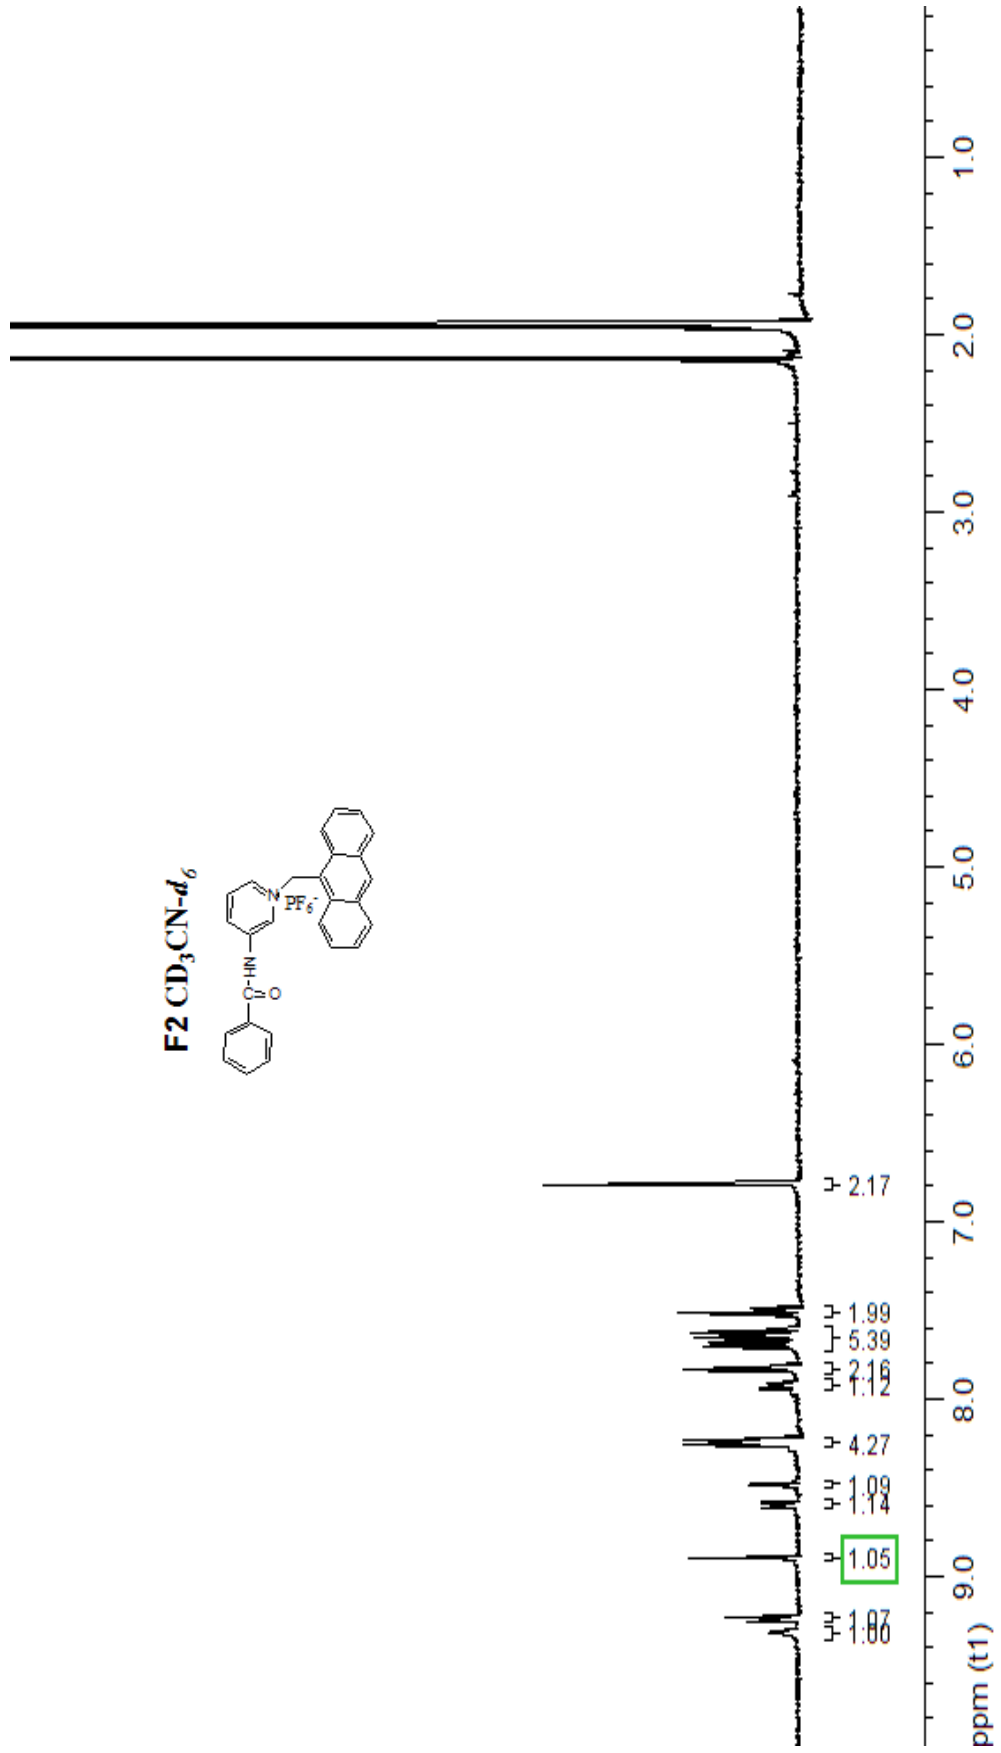

Figure S5 <sup>1</sup>H-NMR of F2

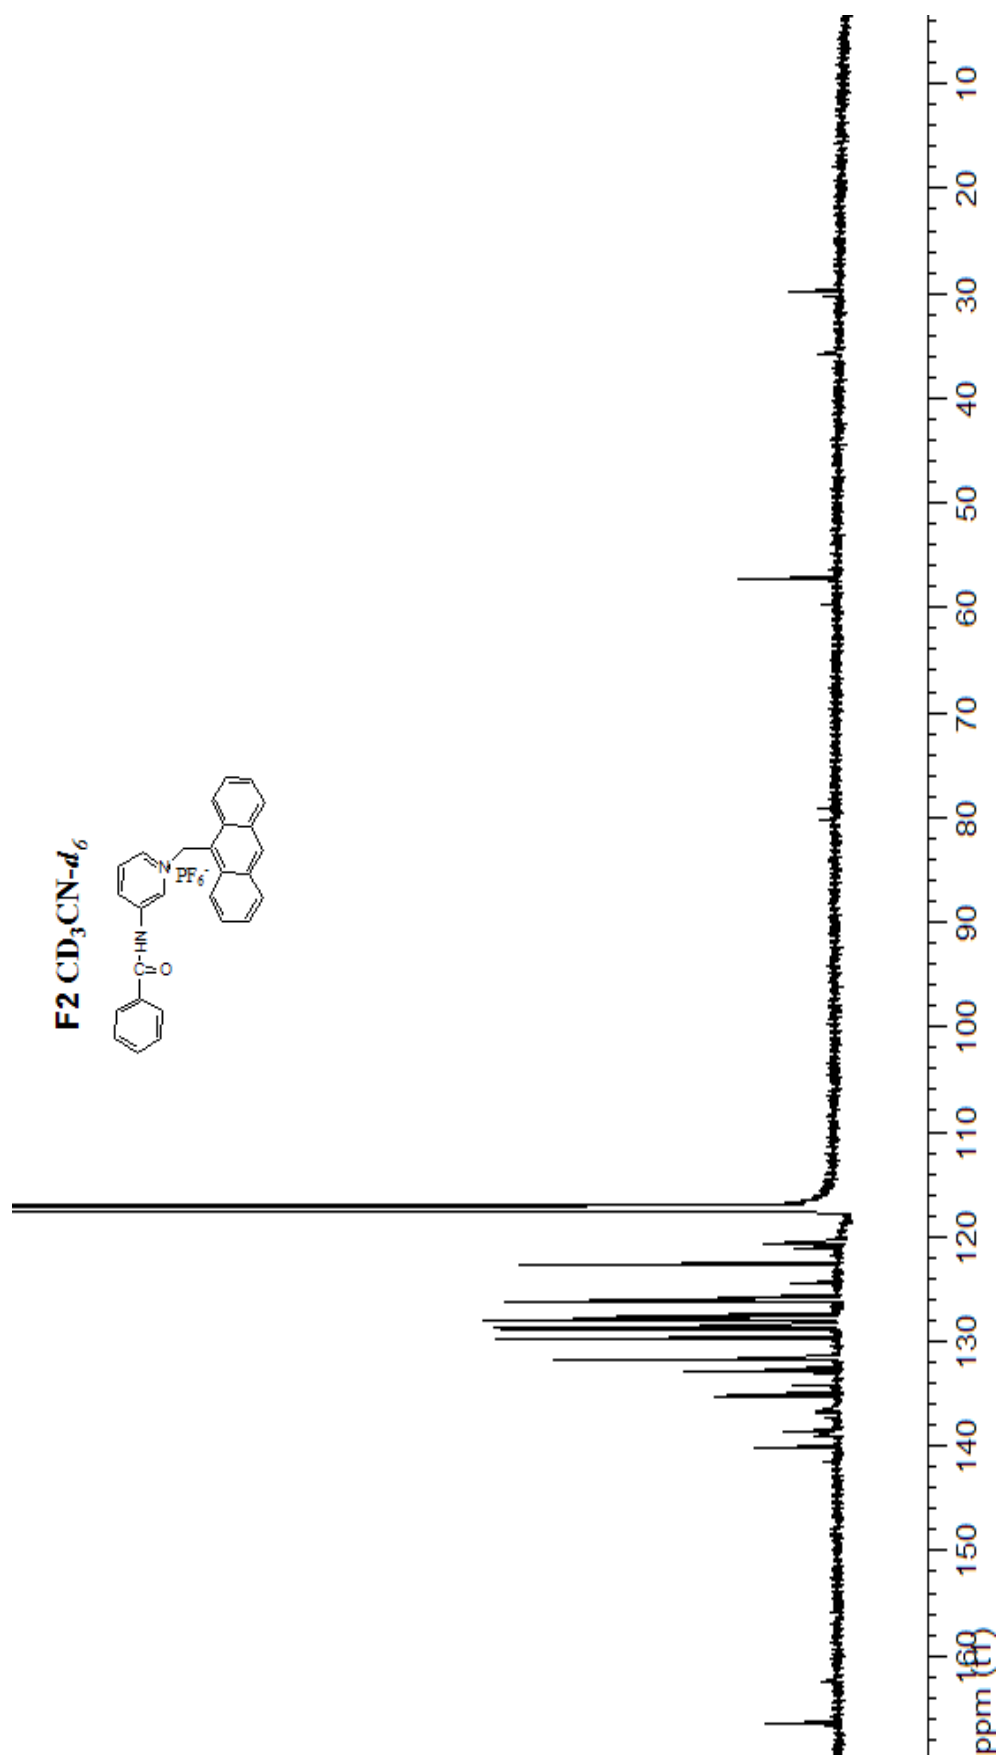

Figure S6 <sup>13</sup>C NMR of F2

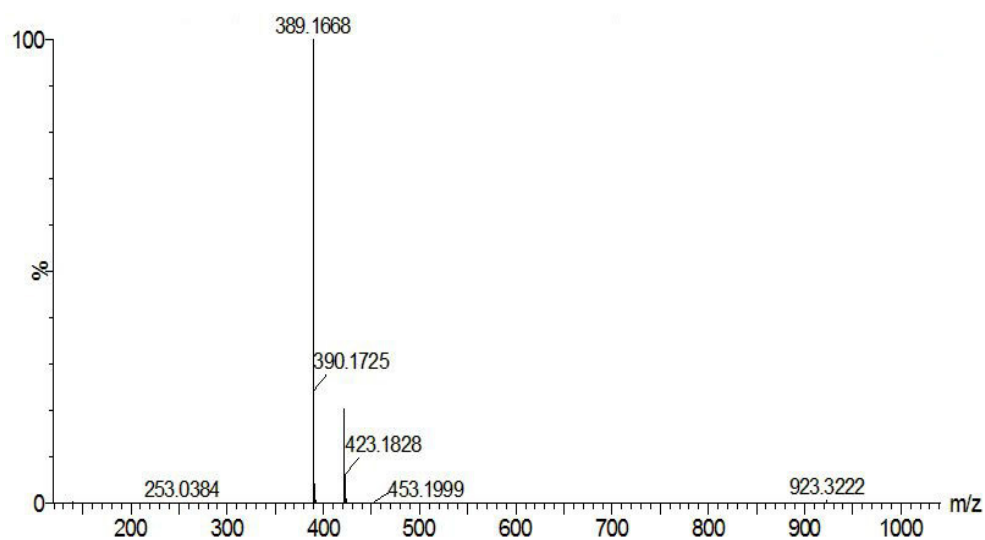

Figure S7 HRMS of F2

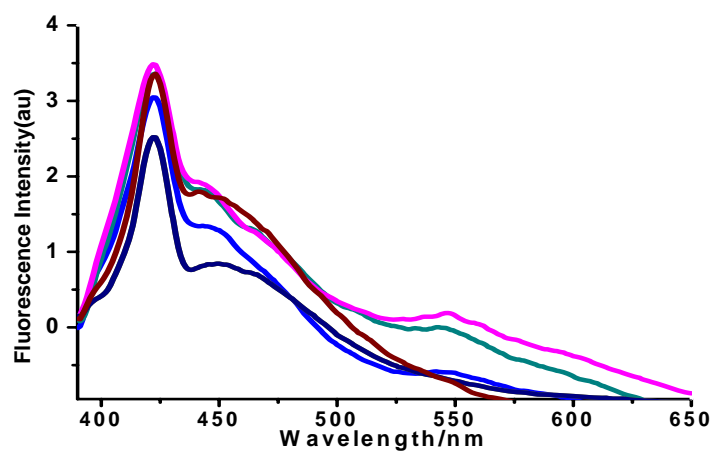

Figure S8 Fluorescence spectrum of various concentration **F2** in  $\text{CH}_3\text{CN}$

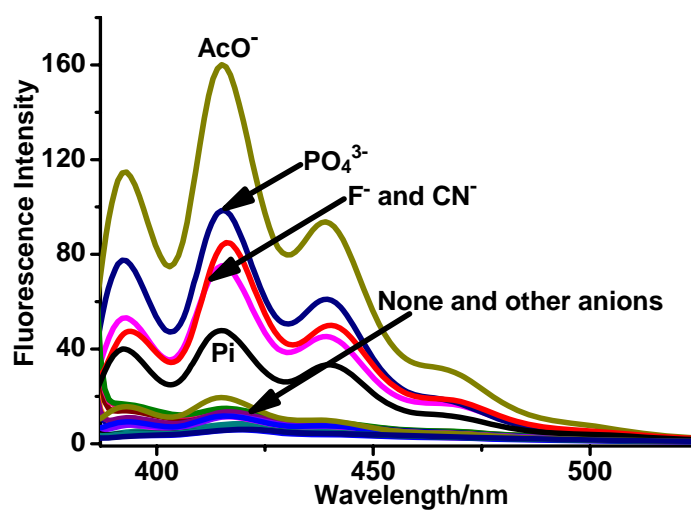

Figure S9 Fluorescence spectrum of **F2** ( $5.0\ \mu\text{M}$ ) upon addition of 5 equiv. of various anions in  $\text{CH}_3\text{CN}$ .
